# Supplementary material for: Temporal change of DNA methylation subclasses between matched newly diagnosed and recurrent glioblastoma
Source: Springer Nature journal article supplement (doi:10.1007/s00401-023-02677-8), 2024-01-20

# Supplementary Figure 1

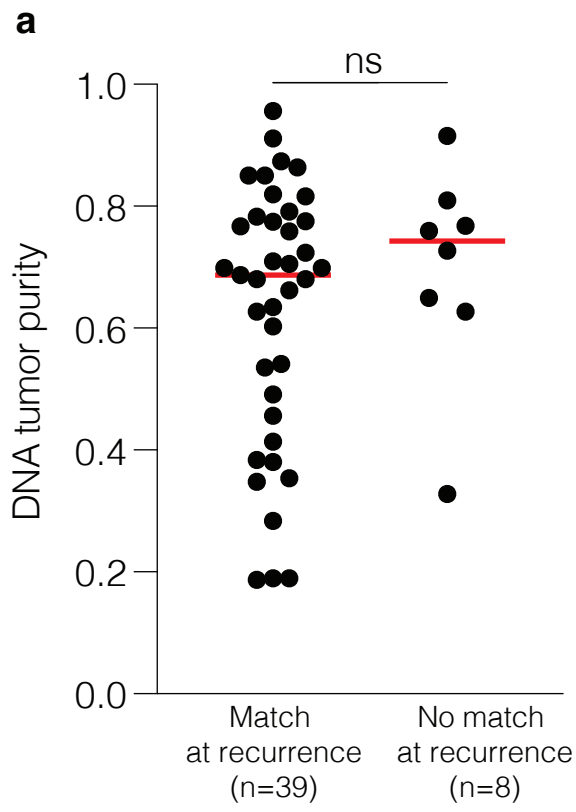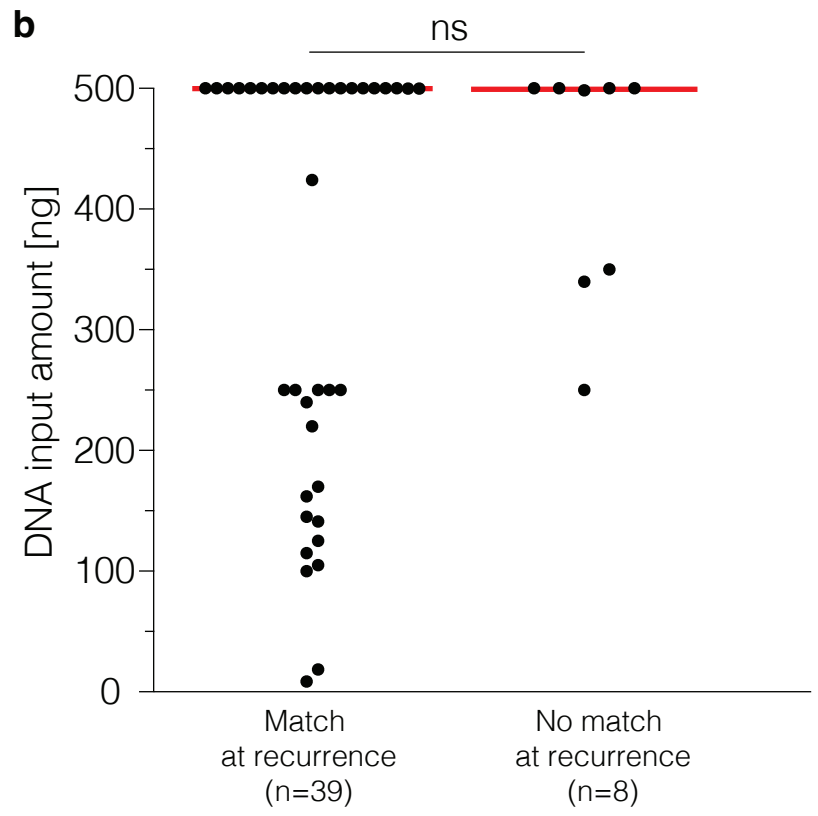

Supplement: MOESM1 [file 26646210]
