# Supplementary material for: Temporal change of DNA methylation subclasses between matched newly diagnosed and recurrent glioblastoma
Source: Springer Nature journal article supplement (doi:10.1007/s00401-023-02677-8), 2024-01-20
Supplement: MOESM2 [file 26646210]

**Supplementary table 1**

| Gene                    | N         | No subclass transition<br>(n=22) | Subclass transition<br>(n=10) | P value |
|-------------------------|-----------|----------------------------------|-------------------------------|---------|
| <i>MDM4</i> , n (%)     |           |                                  |                               |         |
| No alteration           | 30 (93.8) | 21 (95.5)                        | 9 (90.0)                      | 0.56    |
| Amplification           | 2 (6.2)   | 1 (4.5)                          | 1 (10.0)                      |         |
| <i>FGFR3</i> , n (%)    |           |                                  |                               |         |
| No alteration           | 30 (93.8) | 22 (100.0)                       | 8 (80.0)                      | 0.09    |
| Amplification           | 2 (6.2)   | 0 (0.0)                          | 2 (20.0)                      |         |
| <i>PDGFR</i> , n (%)    |           |                                  |                               |         |
| No alteration           | 29 (90.6) | 19 (86.4)                        | 10 (100.0)                    | 0.22    |
| Loss                    | 3 (9.4)   | 3 (13.6)                         | 0 (0.0)                       |         |
| <i>TERT</i> , n (%)     |           |                                  |                               |         |
| No alteration           | 28 (87.5) | 20 (90.9)                        | 8 (0.0)                       | 0.46    |
| Loss                    | 4 (12.5)  | 2 (9.1)                          | 2 (20.0)                      |         |
| <i>EGFR</i> , n (%)     |           |                                  |                               |         |
| No alteration           | 16 (50.0) | 11 (50.0)                        | 5 (50.0)                      | 0.99    |
| Amplification           | 16 (50.0) | 11 (50.0)                        | 5 (50.0)                      |         |
| <i>MET</i> , n (%)      |           |                                  |                               |         |
| No alteration           | 30 (93.8) | 21 (95.5)                        | 9 (90.0)                      | 0.56    |
| Amplification           | 2 (6.2)   | 1 (4.5)                          | 1 (10.0)                      |         |
| <i>CDKN2A/B</i> , n (%) |           |                                  |                               |         |
| No alteration           | 15 (46.9) | 11 (50.0)                        | 4 (40.0)                      | 0.59    |
| Loss                    | 17 (53.1) | 11 (50.0)                        | 6 (60.0)                      |         |
| <i>CDK4</i> , n (%)     |           |                                  |                               |         |
| No alteration           | 28 (87.5) | 19 (86.4)                        | 9 (90.0)                      | 0.77    |
| Amplification           | 4 (12.5)  | 3 (13.6)                         | 1 (10.0)                      |         |
| <i>MDM2</i> , n (%)     |           |                                  |                               |         |
| No alteration           | 30 (93.8) | 21 (95.5)                        | 9 (90.0)                      | 0.56    |
| Amplification           | 2 (6.3)   | 1 (4.5)                          | 1 (10.0)                      |         |
| <i>C19MC</i> , n (%)    |           |                                  |                               |         |
| No alteration           | 26 (81.3) | 18 (81.8)                        | 8 (80.0)                      | 0.90    |
| Loss                    | 6 (18.8)  | 4 (18.2)                         | 2 (20.0)                      |         |
